# Supplementary material for: Complex dynamics in a synchronized cell-free genetic clock
Source: PubMed Central journal article supplement (PMC9126873; doi:10.1038/s41467-022-30478-2), 2022-05-23
Supplement: 41467_2022_30478_MOESM3_ESM.pdf [file 41467_2022_30478_MOESM3_ESM.pdf]

Title: Supplementary Data 1

Description: Contains a table with the DNA sequences of the plasmids and sequencing/colony PCR primers used in this study.
